# Supplementary material for: N-Methyl-N-propyl pyrrolidine bromide (MPPBr) as a bi-functional redox mediator for rechargeable Li–O2 batteries
Source: Royal Society of Chemistry journal article supplement (doi:10.1039/c8ta11849c), 2019-01-01
Supplement: c8ta11849c1.pdf [file c8ta11849c1.pdf]

Supporting information for

**N-methyl-N-propyl Pyrrolidine Bromide (MPPBr) as A Bi-functional Redox Mediator for Rechargeable Li-O<sub>2</sub> Batteries**

**Cheng Zheng†, Wenwen Ding† and Cheng Wang\***

Institute for New Energy Materials & Low-Carbon Technologies, School of Materials Science and Engineering, Tianjin University of Technology, Tianjin 300384, People's Republic of China

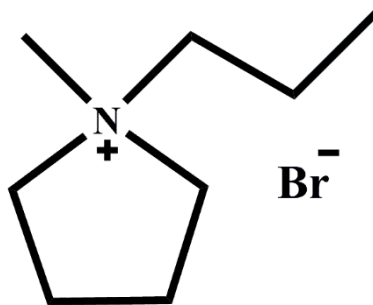

Scheme S1. Structure of MPPBr

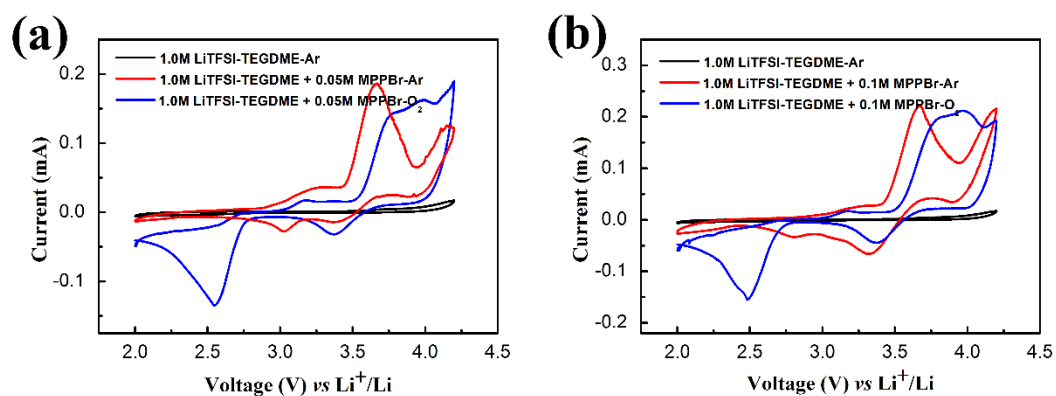

Fig. S1 Cyclic voltammety (0.1 mV/s) of different concentrations MPPBr dissolved in 1.0 M LiTFSI-TEGDME under Ar or O<sub>2</sub> atmosphere. (a) 0.05 M MPPBr; (b) 0.1 M MPPBr. Black lines in both figure represent the primitive 1.0 M LiTFSI-TEGDME electrolyte under Ar atmosphere.

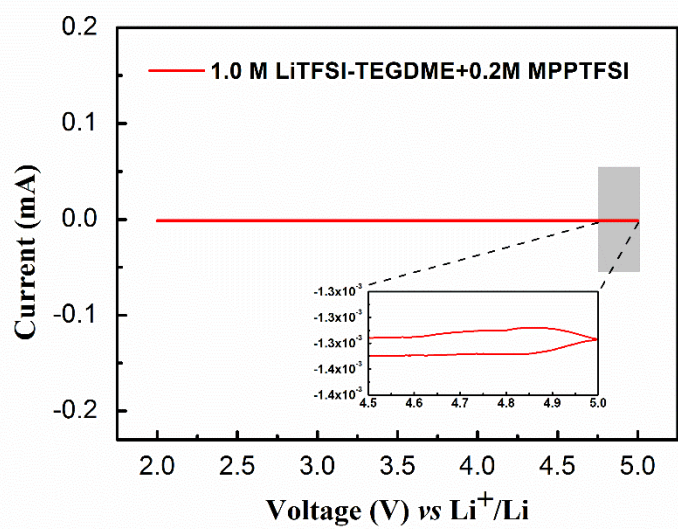

Fig. S2 Electrochemical windows of MPPTFSI at Super P as work electrode, Li foil acting as both anode and the reference electrode, sweeping rate was set at 0.1 mV/s.

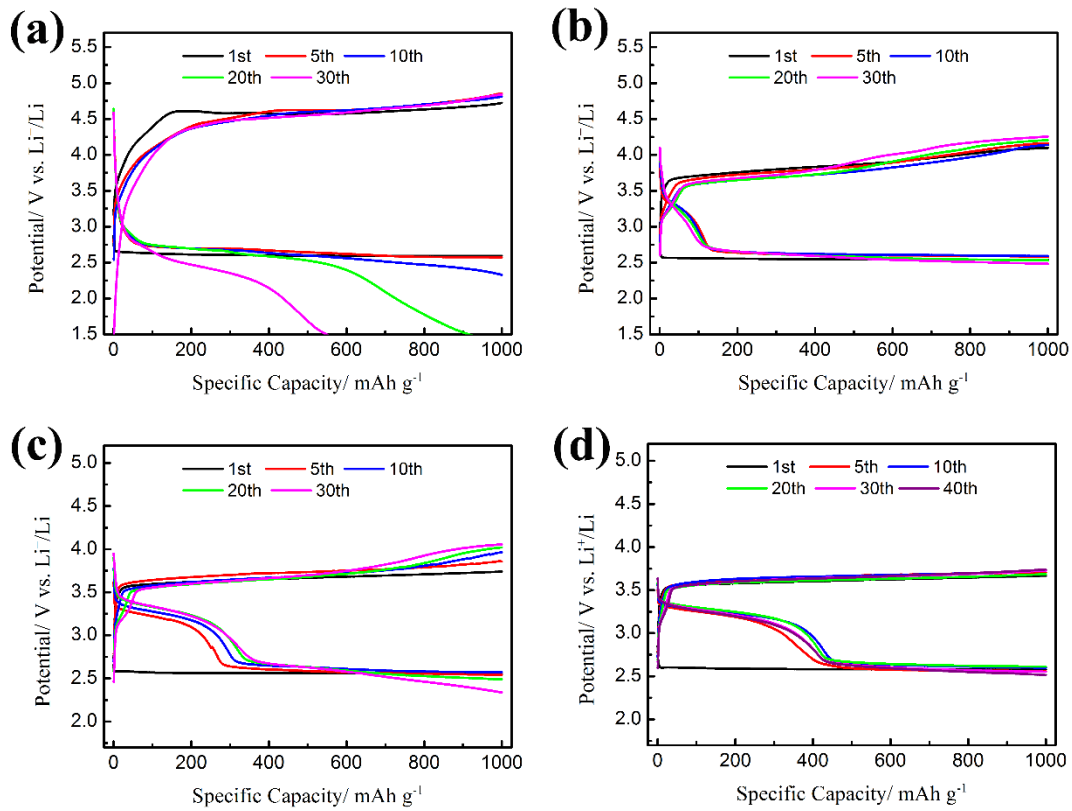

Fig. S3 Voltage profiles of Li-O<sub>2</sub> cells during prolonged cycling with diglyme solution: (a) 1.0 M LiTFSI; (b) 1.0 M LiTFSI + 0.05 M MPPBr; (c) 1.0 M LiTFSI + 0.1 M MPPBr; (d) 1.0 M LiTFSI + 0.2 M MPPBr. The current density is 500 mA g<sup>-1</sup>.

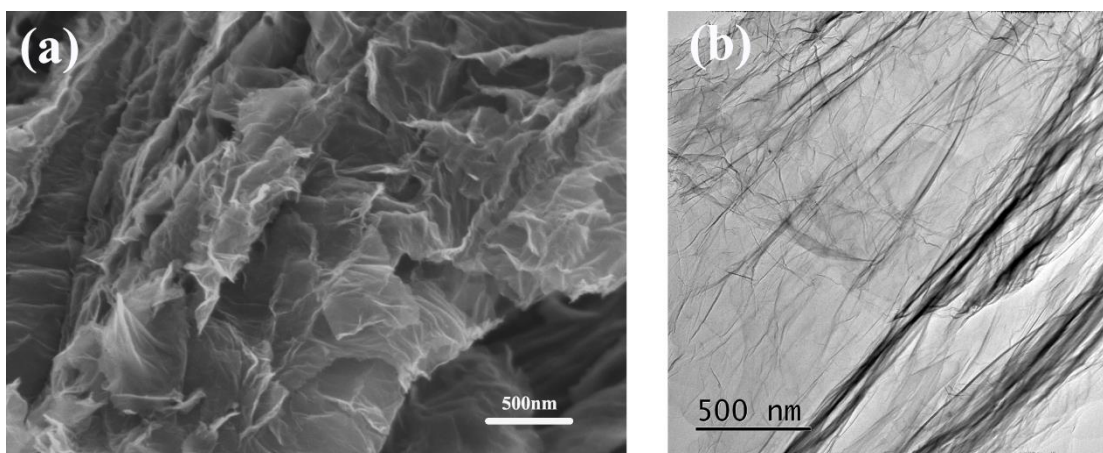

Fig. S4 SEM and TEM images of rGO.

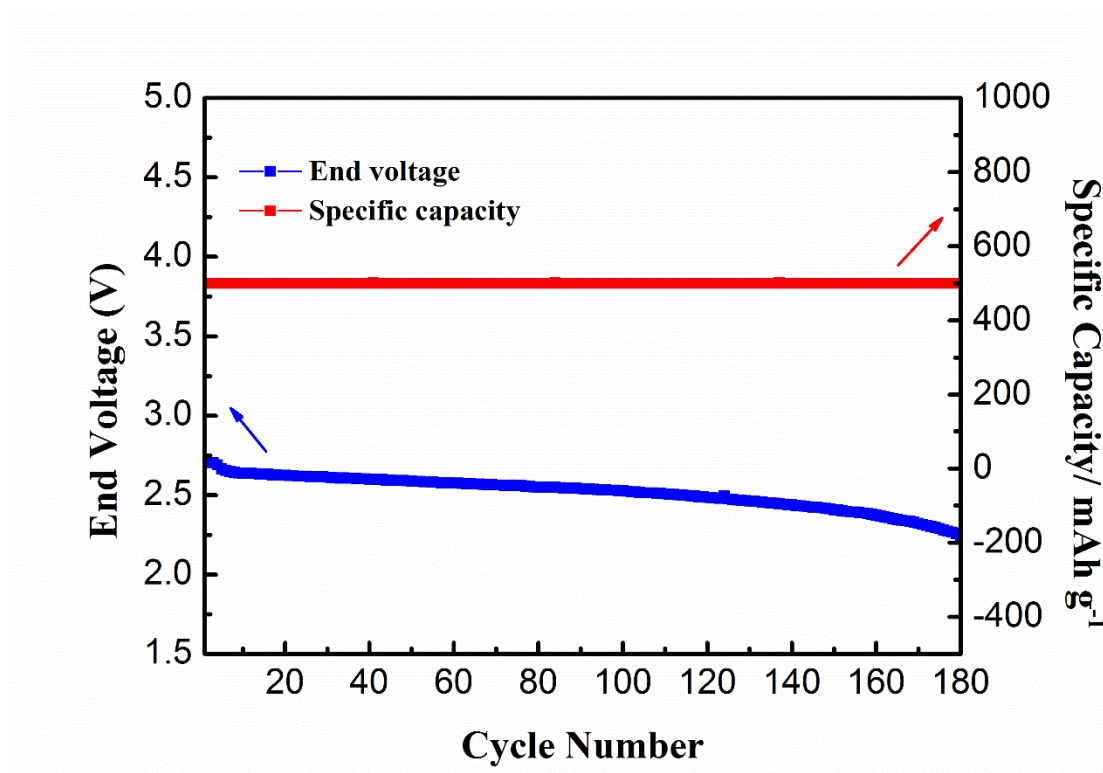

Fig.S5 The cycling performance of a Li-O<sub>2</sub> battery with 1.0 M LiTFSI-TEGDME + 0.2 M MPPBr with a rGO electrode. The current density is 500 mA g<sup>-1</sup>.

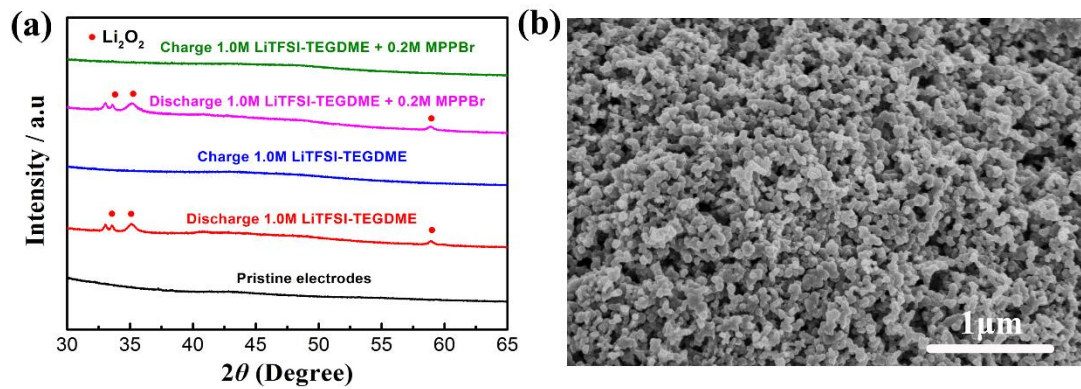

Fig. S6 (a) XRD patterns of the pristine cathode, discharged and charged cathodes cycled with and without the presence of 0.2 M MPPBr. (b) SEM image of the Super P cathode before discharge.

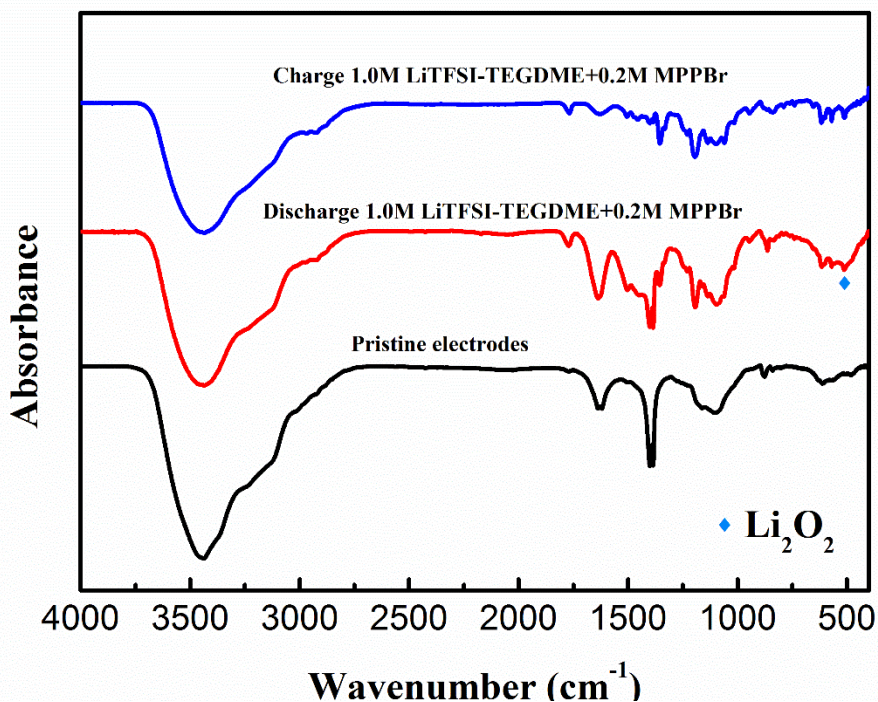

Fig. S7 FTIR spectra of cycled carbon cathodes of Li-O<sub>2</sub> batteries with 1.0 M LiTFSI-TEGDME + 0.2 M MPPBr.

Figure S7 shows the results of Fourier transform infrared spectroscopy (FTIR) of the pristine electrode and cycled electrodes. The spectra show that Li<sub>2</sub>O<sub>2</sub> (sharp peak at  $\approx 500$  cm<sup>-1</sup>) is formed during the discharge process, and there is no clear band of LiOH (sharp peak at  $\approx 3670$  cm<sup>-1</sup>). All of these spectra of cycled electrodes have the pronounced ethers peaks around 1500 - 1000 cm<sup>-1</sup>, which could be attributable to the residual electrolytes on the electrode surface species (TEGDME, MPPBr). The band at 1732 cm<sup>-1</sup> can be attributed to the C=O stretching vibrations of Li<sub>2</sub>CO<sub>3</sub>. The surface of Li<sub>2</sub>CO<sub>3</sub> compounds detected by these measurements were formed only because of CO<sub>2</sub> contamination, probably in the ambient environment.

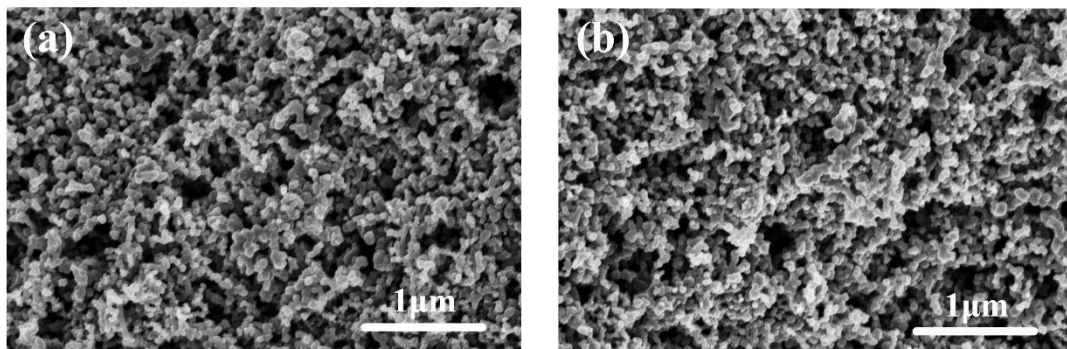

Fig. S8 SEM images of Super P cathodes after charge without 0.2 M MPPBr (a) and with 0.2 M MPPBr (b) dissolved in the 1.0 M LiTFSI-TEGDME electrolyte.

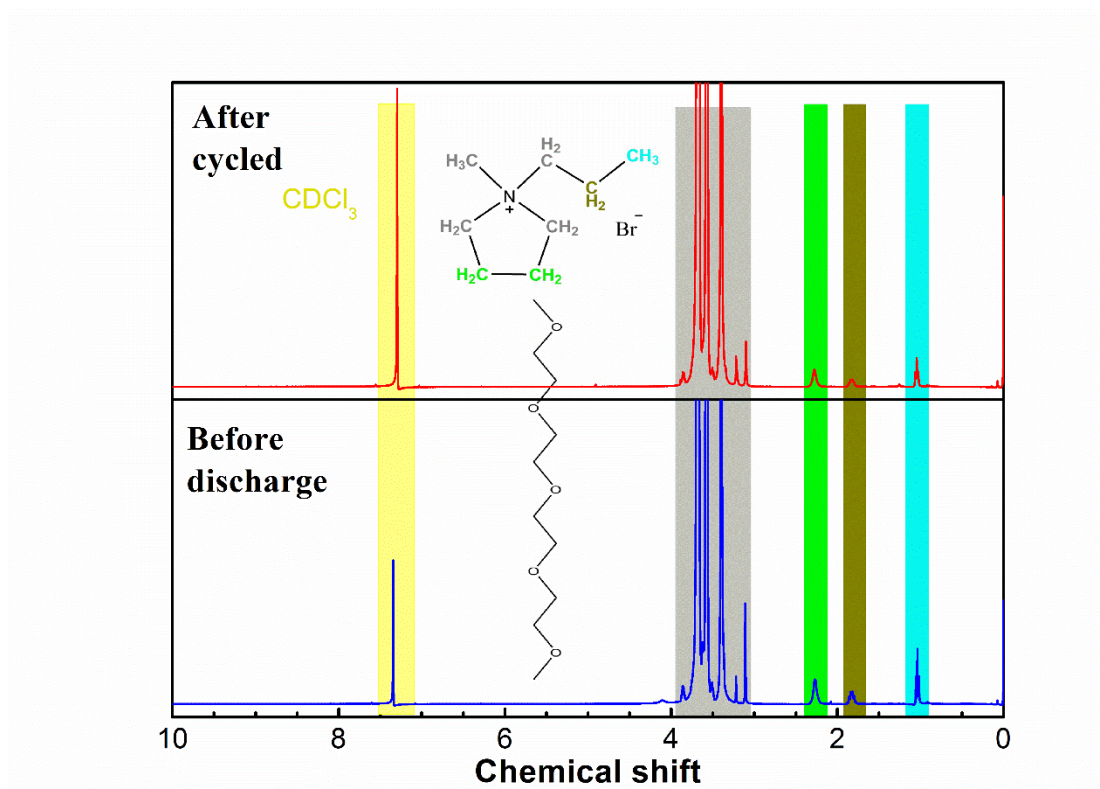

Fig. S9  $^1\text{H}$  NMR spectra of the 1.0 M LiTFSI-TEGDME + 0.2 M MPPBr electrolyte before electrochemical cycling and after 30 cycles of Li-O<sub>2</sub> cells at a current density of 500 mA/g for 1000 mAh/g of capacity.



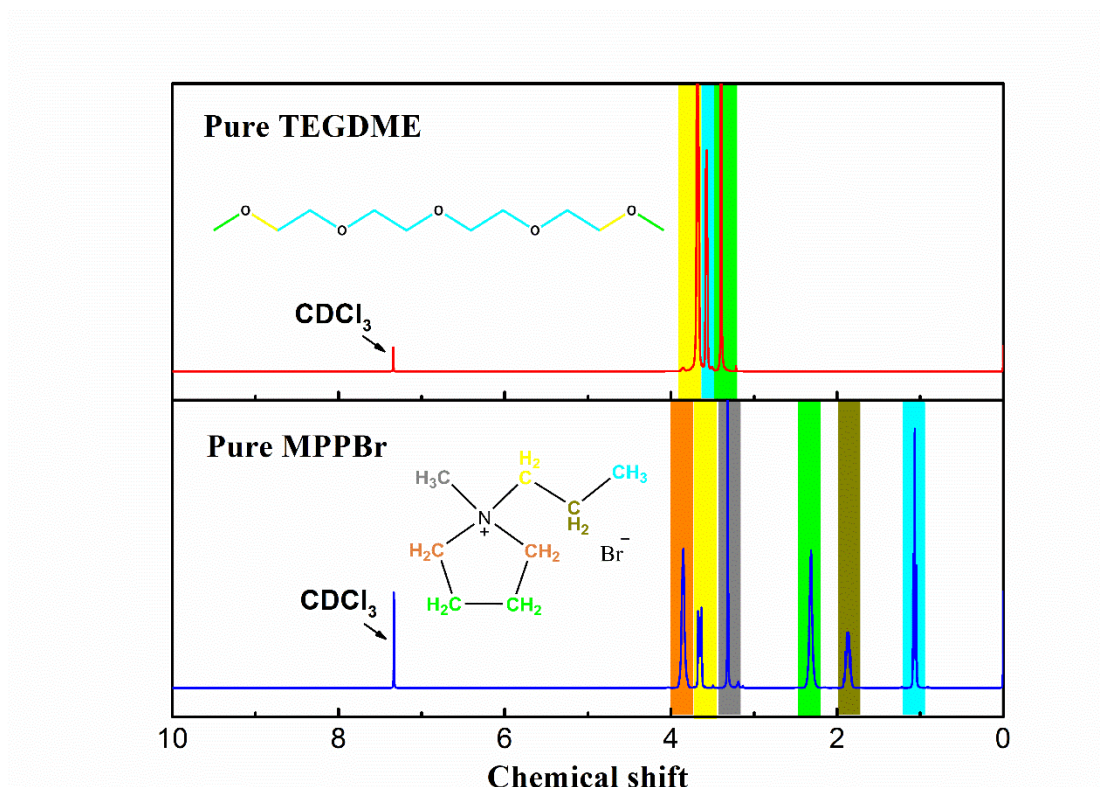

Fig. S10  $^1\text{H}$  NMR spectra of the pure TEGDME and pure MPPBr.

#### A summary of $^1\text{H}$ NMR spectra of the pure compounds

Tetraethylene glycol dimethyl ether (TEGDME)

$^1\text{H}$  NMR (400 MHz,  $\text{CDCl}_3$ )  $\delta$  7.34 (s, 1H), 3.67 (d,  $J = 9.6$  Hz, 12H), 3.57 (dd,  $J = 5.5, 3.6$  Hz, 4H), 3.40 (s, 6H);

N-methyl-N-propyl pyrrolidine bromide (MPPBr)

$^1\text{H}$  NMR (400 MHz,  $\text{CDCl}_3$ )  $\delta$  3.85 (s, 4H), 3.69 – 3.60 (m, 2H), 3.32 (s, 3H), 2.31 (s, 4H), 1.94 – 1.80 (m, 2H), 1.07 (t,  $J = 7.3$  Hz, 3H).

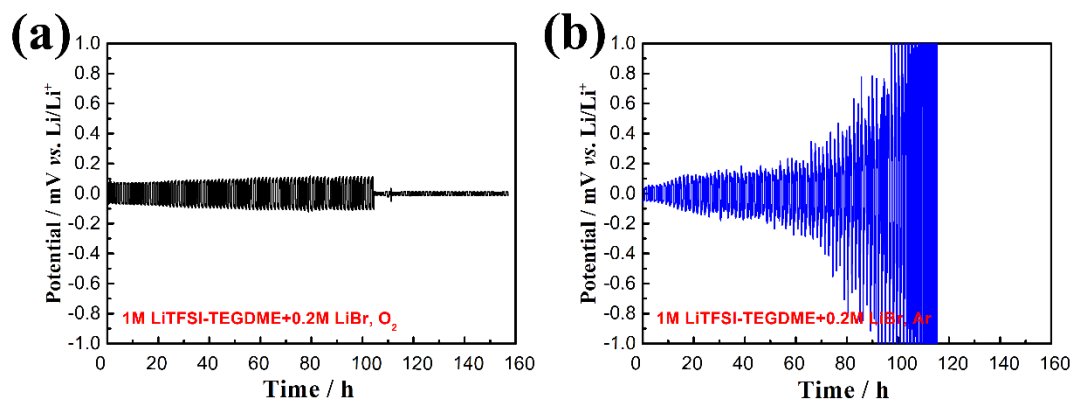

Fig. S11 Electrochemical performance of Li|Li symmetric cells containing 1.0 M LiTFSI-TEGDME + 0.2 M LiBr under O<sub>2</sub> (a) and Ar (b) atmosphere, respectively. The current density was fixed at 0.5 mA cm<sup>-2</sup> with a stripping/plating capacity of 1.0 mAh cm<sup>-2</sup>.

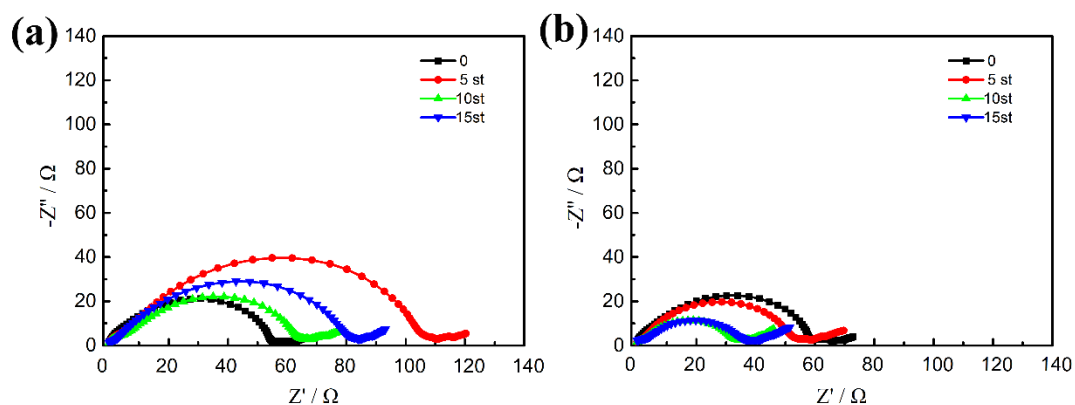

Fig. S12 Electrochemical impedance spectra of the Li|Li symmetric cells measured at the end of various cycle number with (a) 1.0 M LiTFSI-TEGDME and (b) 1.0 M LiTFSI-TEGDME + 0.2 M MPPBr, respectively.

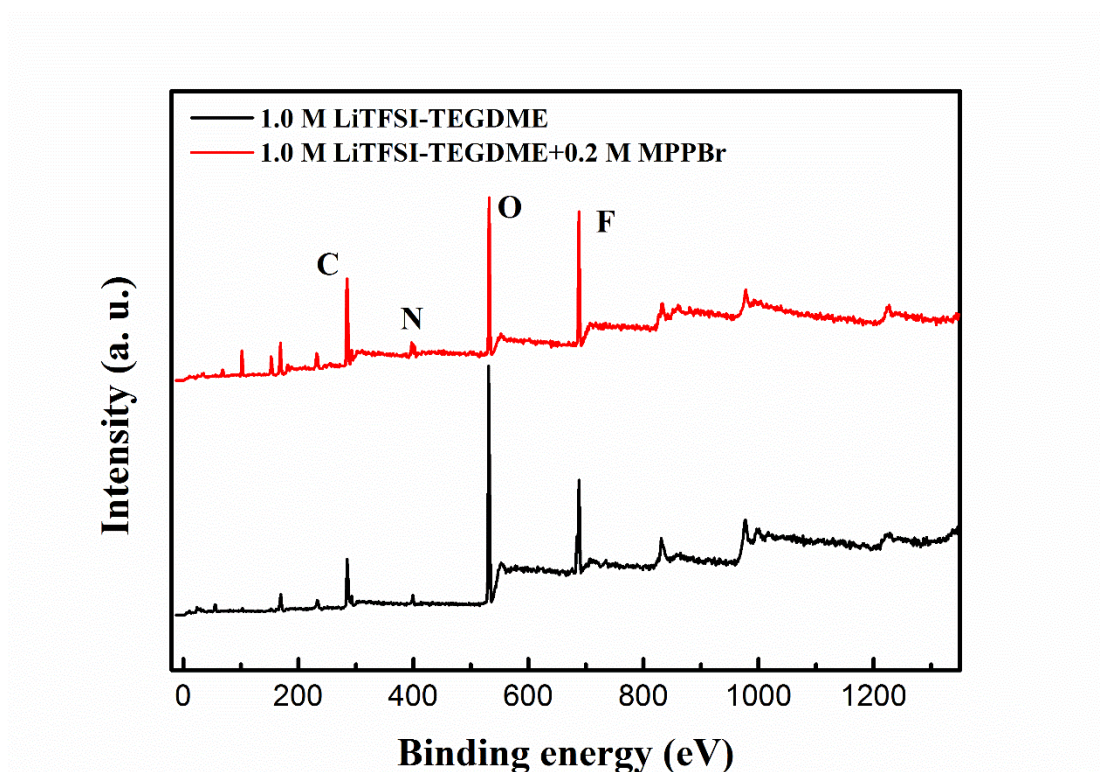

Fig. S13 XPS survey spectra of the Li metal on Li|Li symmetric cells with different electrolytes.

Table S1 XPS characterization of atomic ratio of elements on the Li metal anode on Li|Li symmetric cells after 50 cycles under O<sub>2</sub> atmosphere with 1.0 M LiTFSI-TEGDME and 1.0 M LiTFSI-TEGDME + 0.2 M MPPBr, respectively.

|               | Li     | C      | O      | N     | F      |
|---------------|--------|--------|--------|-------|--------|
| Without MPPBr | 31.83% | 22.31% | 32.04% | 2.27% | 11.55% |
| With MPPBr    | 14.63% | 44.63% | 20.75% | 6.27% | 13.72% |
